# Supplementary material for: Plastic crystal-based electrolytes using novel dicationic salts
Source: Royal Society of Chemistry journal article supplement (doi:10.1039/d1cp04314e), 2022-01-01
Supplement: d1cp04314e1.pdf [file d1cp04314e1.pdf]

## Supplementary Information

### Plastic Crystal-based Electrolytes Using Novel Dicationic Salts

Shanika Abeysooriya<sup>\*a</sup>, Minjae Lee<sup>b</sup> Luke A. O'Dell<sup>c</sup> and Jennifer M. Pringle<sup>\*a</sup>

<sup>a</sup> Institute for Frontier Materials (IFM), Deakin University, Burwood Hwy, VIC 3125, Australia

<sup>b</sup> Department of Chemistry, Kunsan National University, Gunsan, 54150, South Korea

<sup>c</sup> Institute for Frontier Materials, Deakin University, Geelong VIC, 3220, Australia

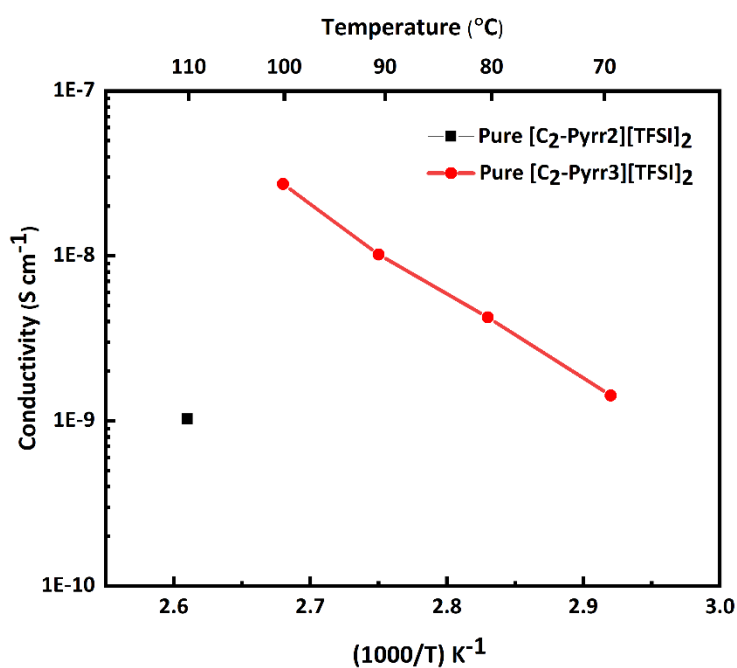

Figure S 1. Arrhenius plot of conductivity for neat [C<sub>2</sub>-Pyrr2][TFSI]<sub>2</sub> and neat [C<sub>2</sub>-Pyrr3][TFSI]<sub>2</sub>.

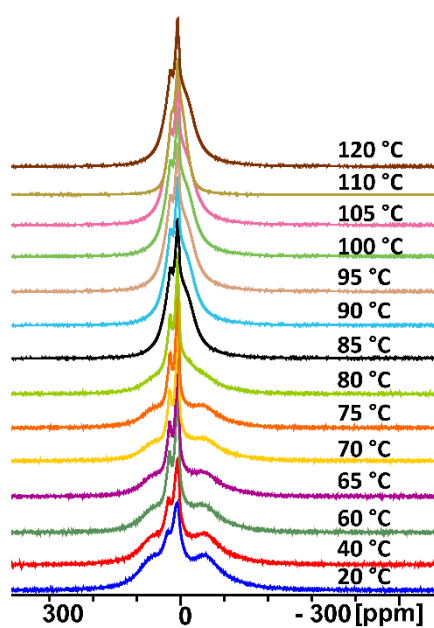

Figure S 2. <sup>1</sup>H static NMR of neat [C<sub>2</sub>-Pyrr2][TFSI]<sub>2</sub>

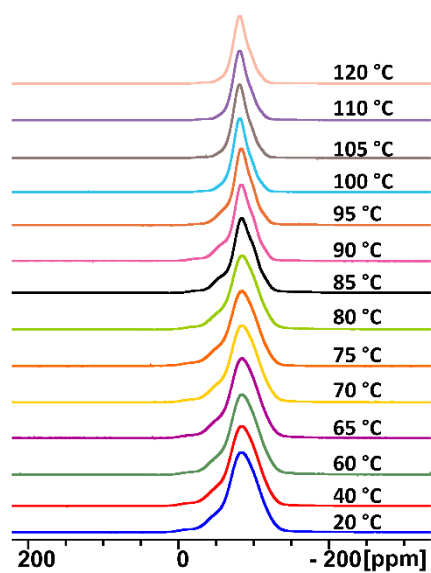

Figure S 3.  $^{19}\text{F}$  static NMR of neat  $[\text{C}_2\text{-Pyrr2}][\text{TFSI}]_2$

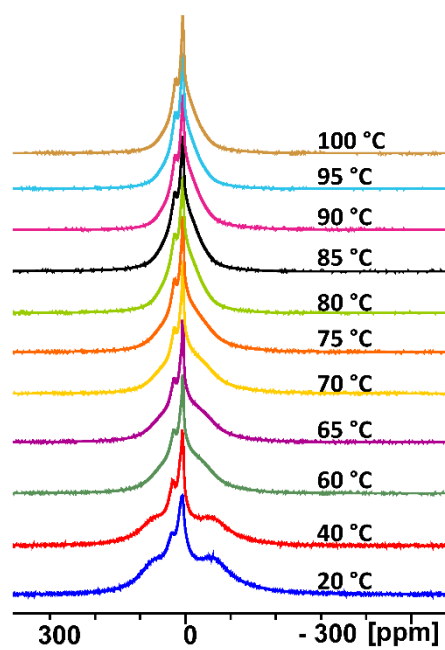

Figure S 4.  $^1\text{H}$  static NMR of neat  $[\text{C}_2\text{-Pyrr3}][\text{TFSI}]_2$

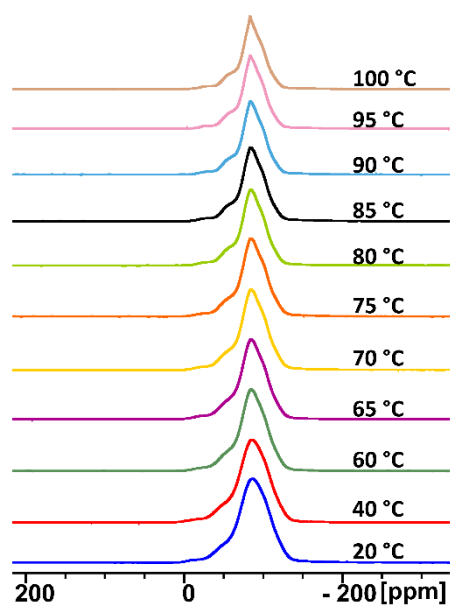

Figure S 5.  $^{19}\text{F}$  static NMR of neat  $[\text{C}_2\text{-Pyrr3}][\text{TFSI}]_2$

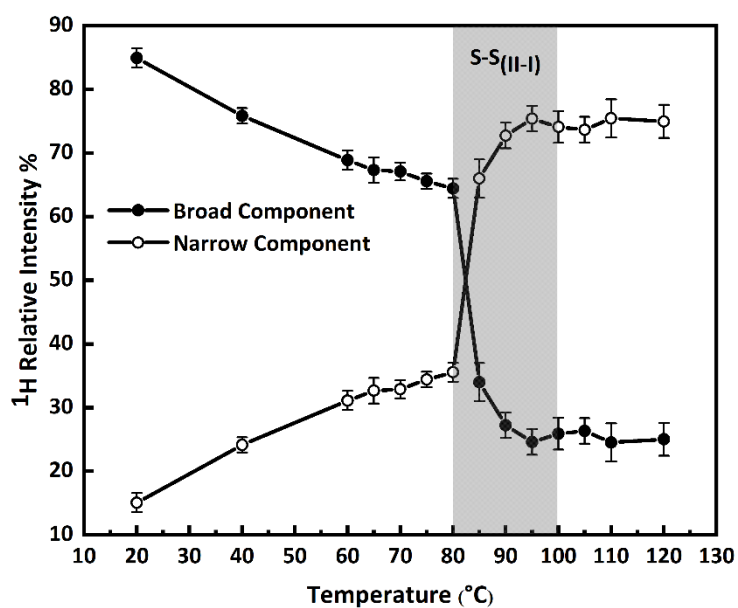

Figure S 6.  $^1\text{H}$  NMR relative intensity of neat  $[\text{C}_2\text{-Pyrr2}][\text{TFSI}]_2$  recorded at increasing temperatures. The phase II to II transition is marked with a shaded area.

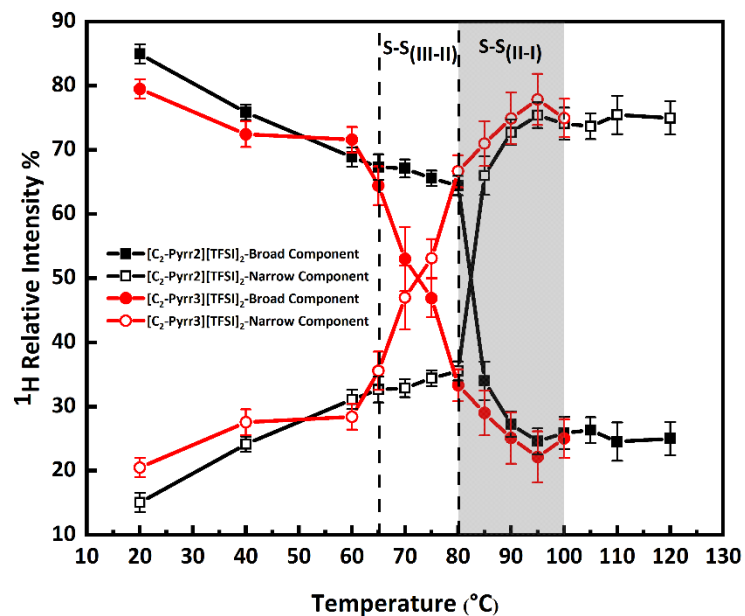

**Figure S 7.**  $^1\text{H}$  NMR relative intensity of neat  $[\text{C}_2\text{-Pyrr2}][\text{TFSI}]_2$  and of neat  $[\text{C}_2\text{-Pyrr3}][\text{TFSI}]_2$  recorded at increasing temperatures. The III to II phase transition of pure  $[\text{C}_2\text{-Pyrr3}][\text{TFSI}]_2$  is shown by the clear region and the II to I phase transition of each system marked by the shaded region.

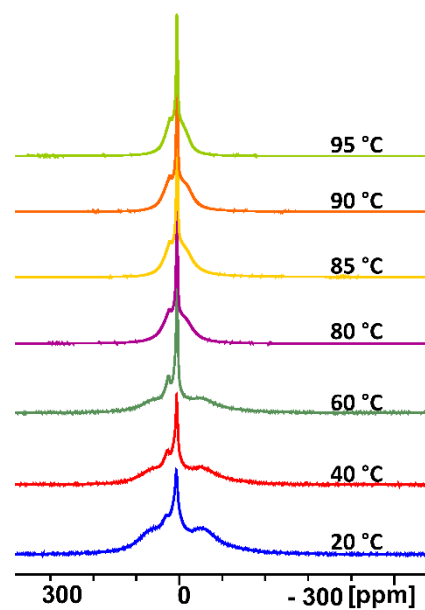

**Figure S 8.**  $^1\text{H}$  static NMR of  $[\text{C}_2\text{-Pyrr2}][\text{TFSI}]_2/\text{LiTFSI}$  (10 mol % LiTFSI).

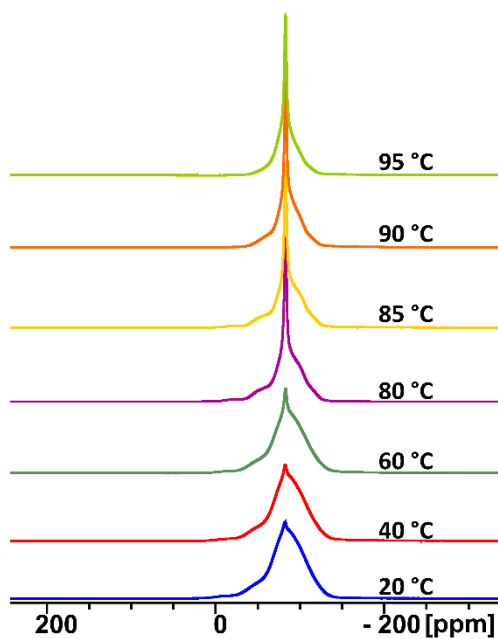

**Figure S 9.**  $^{19}\text{F}$  static NMR of  $[\text{C}_2\text{-Pyrr2}][\text{TFSI}]_2/\text{LiTFSI}$  (10 mol % LiTFSI).

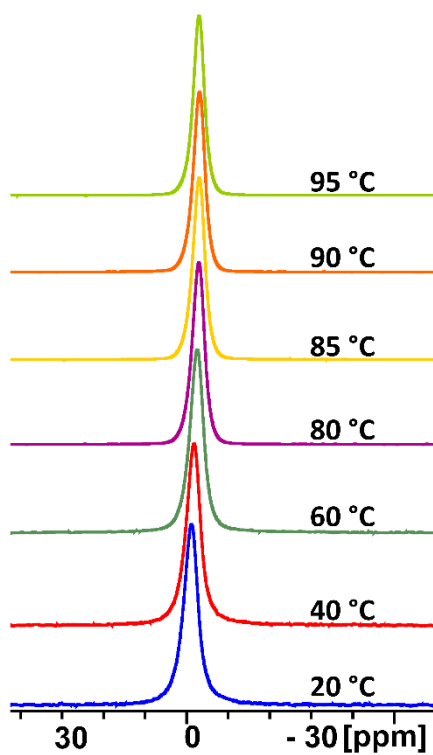

**Figure S 10.**  $^7\text{Li}$  static NMR of  $[\text{C}_2\text{-Pyrr2}][\text{TFSI}]_2/\text{LiTFSI}$  (10 mol % LiTFSI).

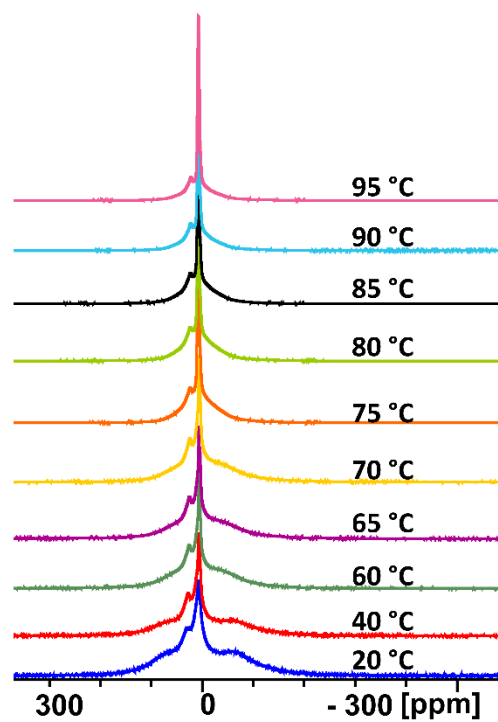

Figure S 11.  $^1\text{H}$  static NMR of  $[\text{C}_2\text{-Pyrr3}][\text{TFSI}]_2/\text{LiTFSI}$  (10 mol % LiTFSI).

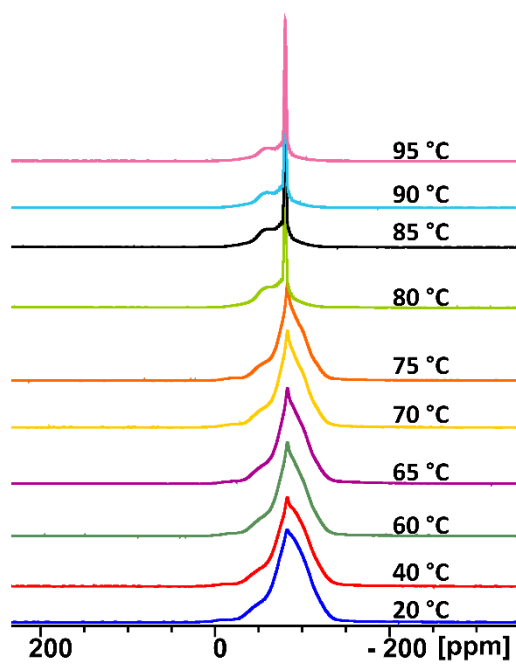

Figure S 12.  $^{19}\text{F}$  static NMR of  $[\text{C}_2\text{-Pyrr3}][\text{TFSI}]_2/\text{LiTFSI}$  (10 mol % LiTFSI).

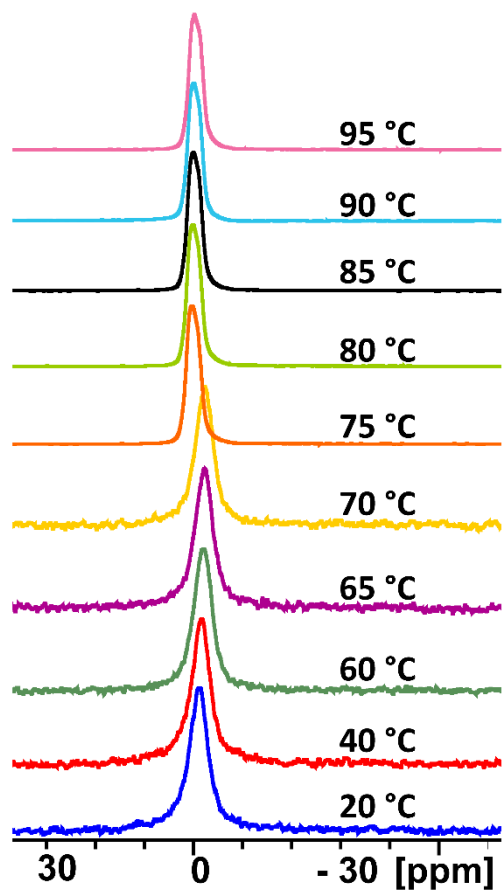

Figure S 13.  $^7\text{Li}$  static NMR of  $[\text{C}_2\text{-Pyrr}_3][\text{TFSI}]_2/\text{LiTFSI}$  (10 mol % LiTFSI).

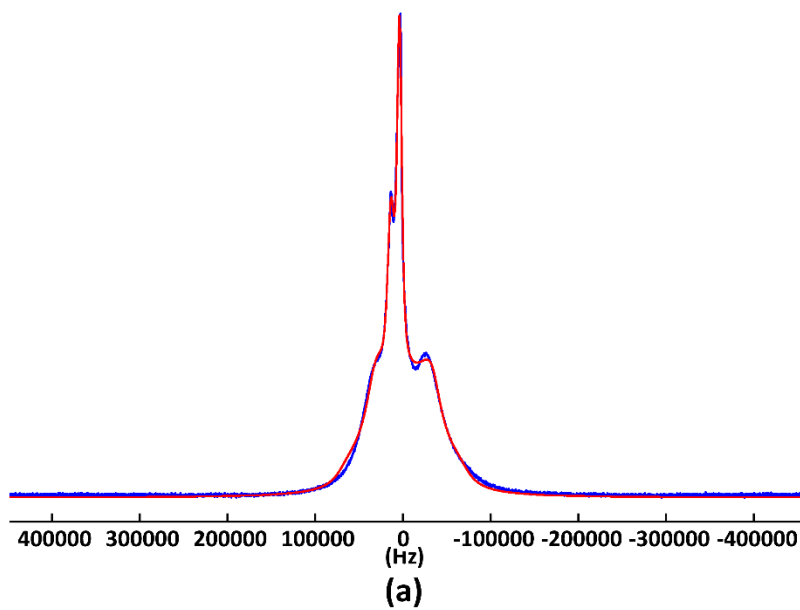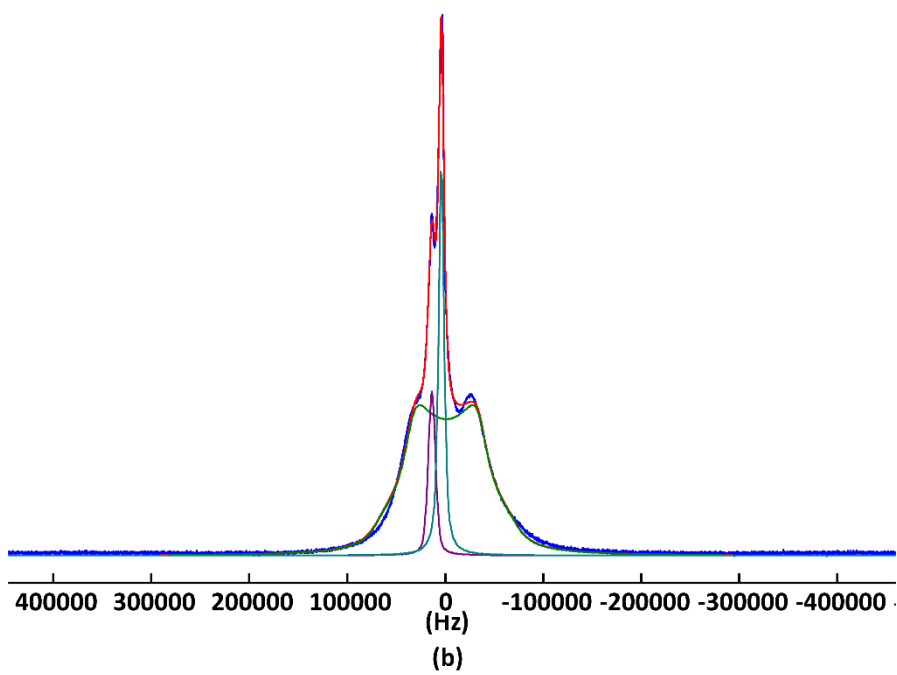

Figure S 14. (a) and (b)  $^1\text{H}$  static NMR fitting using DMFIT software.



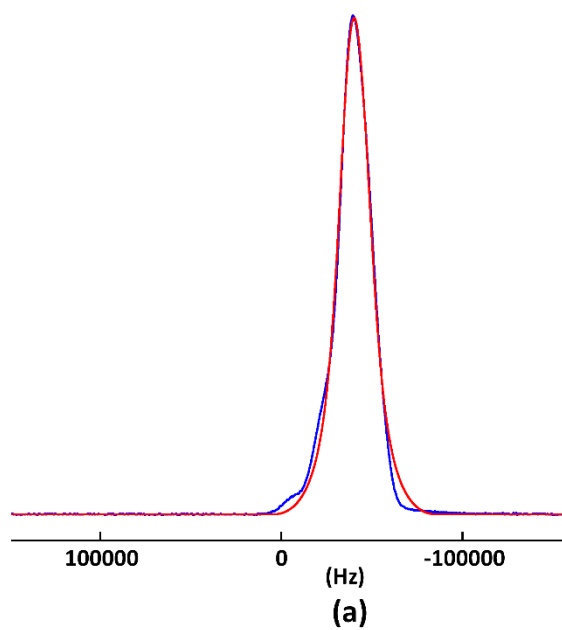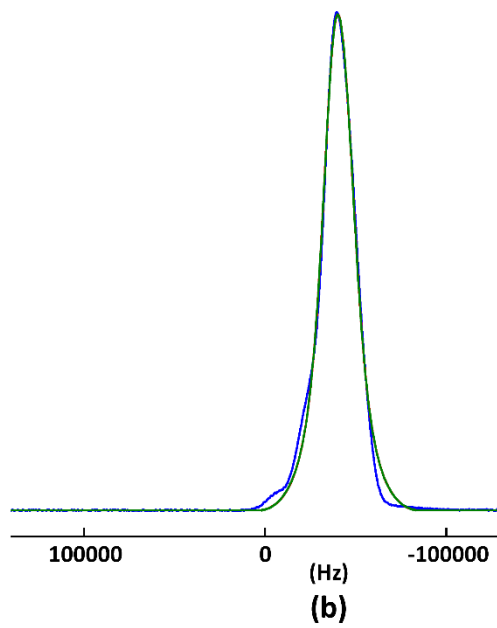

**Figure S 15.** (a) and (b)  $^{19}\text{F}$  static NMR fitting using DMFIT software.

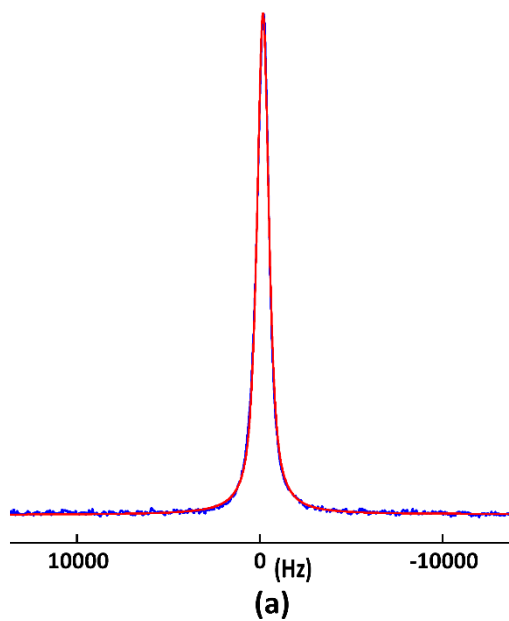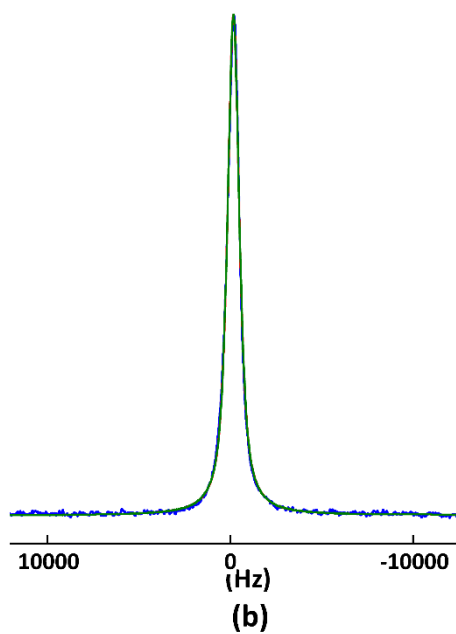

**Figure S 16.** (a) and (b)  ${}^7\text{Li}$  static NMR fitting using DMFIT software.

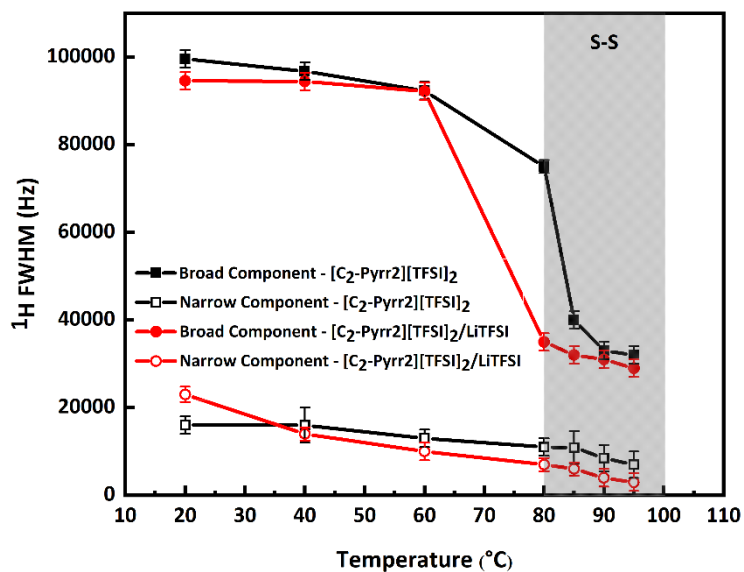

**Figure S 17.** <sup>1</sup>H NMR line widths of pure [C<sub>2</sub>-Pyrr2][TFSI]<sub>2</sub> and [C<sub>2</sub>-Pyrr2][TFSI]<sub>2</sub>/LiTFSI (10 mol % LiTFSI) mixture recorded at increasing temperatures. The phase transition of both pure [C<sub>2</sub>-Pyrr2][TFSI]<sub>2</sub> (80–100 °C) and [C<sub>2</sub>-Pyrr2][TFSI]<sub>2</sub>/LiTFSI is marked with a shaded area.

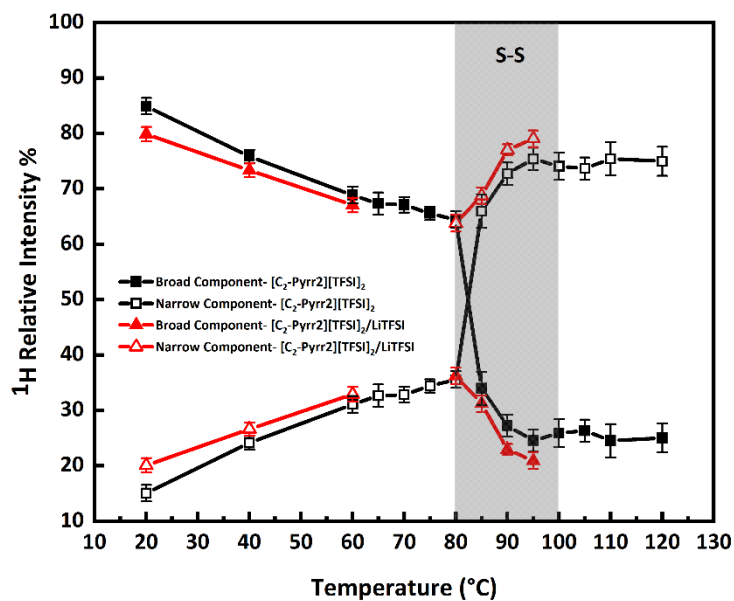

**Figure S 18.** <sup>1</sup>H NMR relative intensity of pure [C<sub>2</sub>-Pyrr2][TFSI]<sub>2</sub> and [C<sub>2</sub>-Pyrr2][TFSI]<sub>2</sub>/LiTFSI (10 mol% LiTFSI) mixture recorded at increasing temperatures. The phase transition of both pure [C<sub>2</sub>-Pyrr2][TFSI]<sub>2</sub> (80–100 °C) and [C<sub>2</sub>-Pyrr2][TFSI]<sub>2</sub>/LiTFSI is marked with a shaded area.

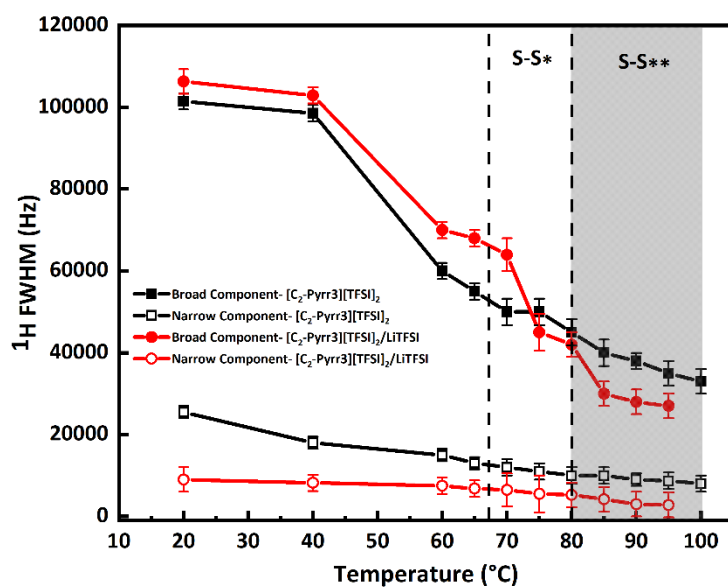

**Figure S 19.** <sup>1</sup>H NMR line widths of [C<sub>2</sub>-Pyrr3][TFSI]<sub>2</sub>/LiTFSI (10 mol % LiTFSI) recorded at increasing temperatures. The phase transition for both pure [C<sub>2</sub>-Pyrr3][TFSI]<sub>2</sub> and [C<sub>2</sub>-Pyrr3][TFSI]<sub>2</sub>/LiTFSI is shown as S\*: 65–80 °C and S\*\*: 80–100 °C.

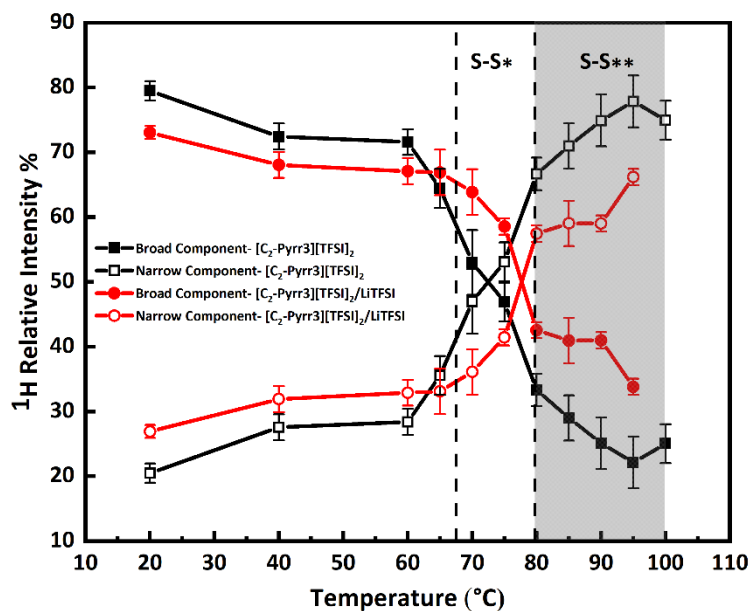

**Figure S 20.** <sup>1</sup>H NMR relative intensity of [C<sub>2</sub>-Pyrr3][TFSI]<sub>2</sub>/LiTFSI (10 mol % LiTFSI) recorded at increasing temperatures. The phase transition for both pure [C<sub>2</sub>-Pyrr3][TFSI]<sub>2</sub> and [C<sub>2</sub>-Pyrr3][TFSI]<sub>2</sub>/LiTFSI is shown as S\*: 65–80 °C and S\*\*: 80–100 °C.

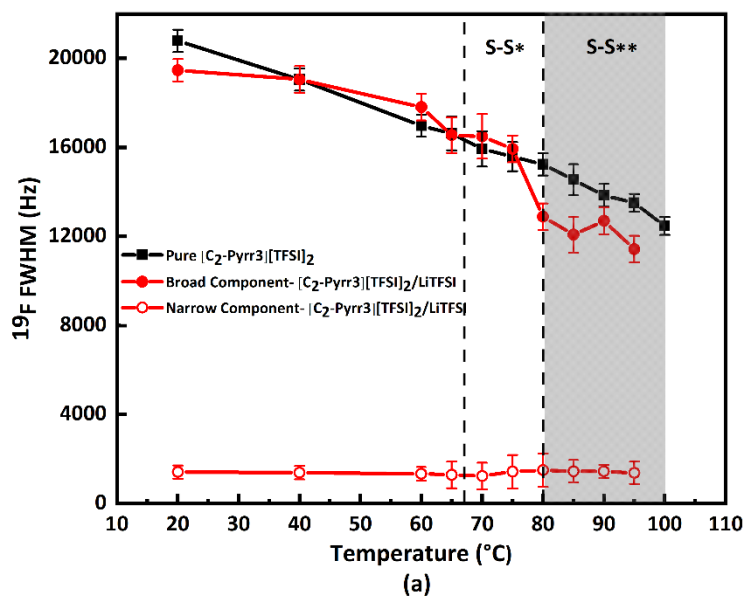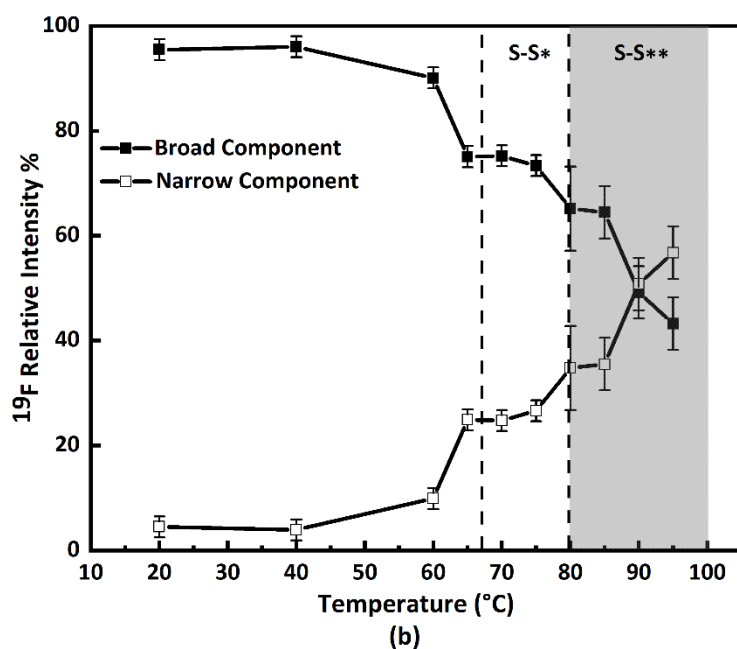

**Figure S 21.** (a)  $^{19}\text{F}$  NMR line width of pure  $[C_2\text{-Pyrr}3][TFSI]_2$  and  $[C_2\text{-Pyrr}3][TFSI]_2/LiTFSI$  (10 mol %  $LiTFSI$ ) and (b)  $^{19}\text{F}$  NMR relative intensity of  $[C_2\text{-Pyrr}3][TFSI]_2/LiTFSI$  (10 mol %  $LiTFSI$ ) recorded at increasing temperatures. The phase transition for both pure  $[C_2\text{-Pyrr}3][TFSI]_2$  and  $[C_2\text{-Pyrr}3][TFSI]_2/LiTFSI$  is shown as S\*: 65–80 °C and S\*\*: 80–100 °C. For FWHM and relative intensity analysis, CSA model and a Gaussian model (for the narrow component) were used in combination for peak fitting.

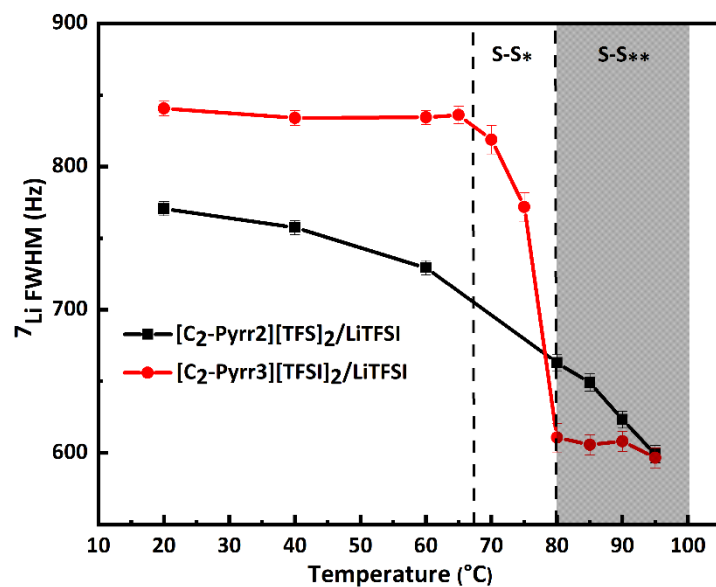

**Figure S 22.**  ${}^7\text{Li}$ NMR line widths of  $[\text{C}_2\text{-Pyrr}_2][\text{TFSI}]_2/\text{LiTFSI}$  and  $[\text{C}_2\text{-Pyrr}_3][\text{TFSI}]_2/\text{LiTFSI}$  recorded at increasing temperatures. The 68–80  ${}^{\circ}\text{C}$  phase transition of  $[\text{C}_2\text{-Pyrr}_3][\text{TFSI}]_2/\text{LiTFSI}$  is shown by the clear region and the 80–100  ${}^{\circ}\text{C}$  phase transition of each system marked as the shaded region.
